# Supplementary material
Source: Springer Nature journal article supplement (https://www.springermedizin.de/resource/supplementary/13014_2007_65_MOESM2_ESM.pdf/9632834)

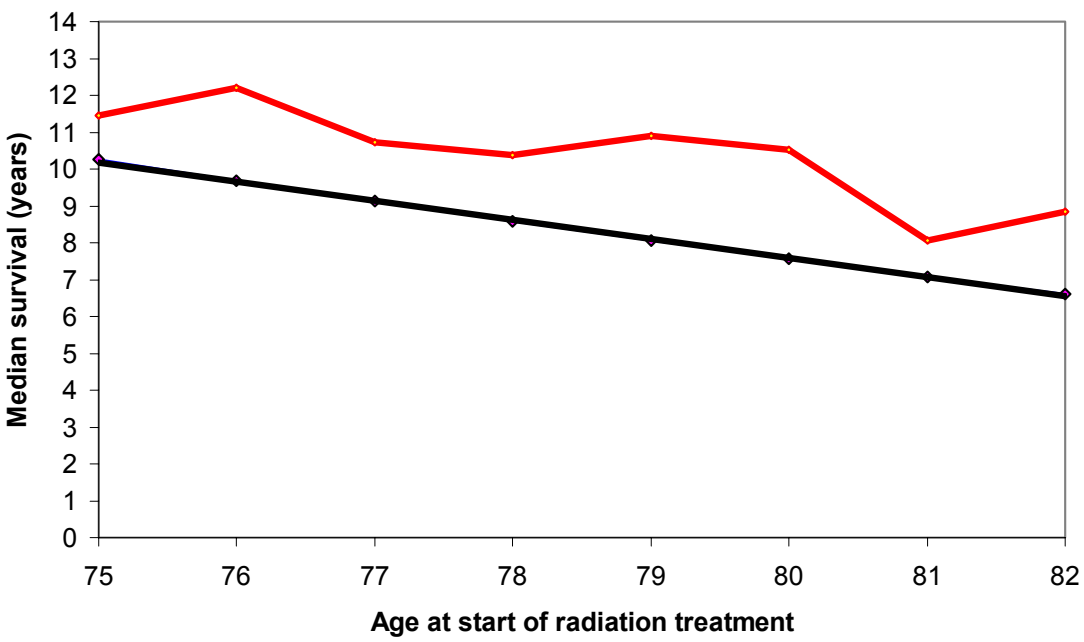

Supplement: MOESM2 [file 9632834]
